# Supplementary material for: The Influence of Eating at Home on Dietary Diversity and Airway Inflammation in Portuguese School-Aged Children
Source: MDPI journal article supplement (doi:10.3390/ijerph18052646), 2021-03-05
Supplement: s1 [file s1]

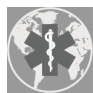

**Table S1.** Characteristics of the participants included and non-included.

| Characteristics                                   | Included (n = 590)    | Excluded (n = 268)    | Total (n = 858)       | p-value |
|---------------------------------------------------|-----------------------|-----------------------|-----------------------|---------|
| Asthma symptoms <sup>†</sup> , n (%)              |                       |                       |                       |         |
| Wheezing                                          | 50 (8.50)             | 29 (10.82)            | 79 (9.20)             | 0.271   |
| Cough                                             | 69 (11.70)            | 29 (10.82)            | 98 (11.40)            | 0.709   |
| Current respiratory symptoms <sup>†</sup> , n (%) |                       |                       |                       |         |
| Breathing difficulties                            | 54 (10.20)            | 28 (10.45)            | 82 (10.80)            | 0.444   |
| Irritative cough                                  | 155 (29.10)           | 77 (28.73)            | 232 (30.50)           | 0.203   |
| Lung function, median                             |                       |                       |                       |         |
| FVC, L                                            | 1.89 (1.69–2.14)      | 1.88 (1.67–2.12)      | 1.89 (1.69–2.14)      | 0.509   |
| FVC, % predicted                                  | 104.66 (95.73–115.29) | 107.38 (96.87–117.44) | 105.28 (95.92–115.82) | 0.258   |
| FEV1, L                                           | 1.75 (1.58–1.95)      | 1.73 (1.55–1.95)      | 1.75 (1.58–1.95)      | 0.538   |
| FEV1, % predicted                                 | 100.76 (91.65–110.20) | 101.93 (93.86–111.38) | 101.26 (92.38–110.96) | 0.170   |
| FEF25-75, L/s                                     | 2.28 (1.95–2.63)      | 2.29 (1.89–2.70)      | 2.28 (1.92–2.65)      | 0.599   |
| FEF25-75, % predicted                             | 93.76 (82.41–108.60)  | 95.53 (80.98–114.21)  | 94.03 (81.99–110.22)  | 0.427   |
| FEV1 reversibility, %                             | 33.47 (0.00–6.70)     | 4.27 (0.70–7.79)      | 3.66 (0.44–7.14)      | 0.044   |
| FEF25-75 reversibility, %                         | 10.27 (2.09–19.02)    | 14.19 (5.88–25.00)    | 11.69 (2.59–20.79)    | 0.044   |
| Positive bronchodilation <sup>§</sup> , n (%)     | 32 (5.40)             | 25 (9.33)             | 57 (6.60)             | 0.033   |
| Asthma definitions, n (%)                         |                       |                       |                       |         |
| Ever                                              | 41 (7.20)             | 13 (4.85)             | 54 (6.50)             | 0.230   |
| Medical diagnosis with asthma symptoms or +BD     | 54 (9.20)             | 26 (9.70)             | 80 (9.30)             | 0.798   |
| Medical diagnosis and under asthma treatment      | 33 (5.60)             | 13 (4.85)             | 46 (5.40)             | 0.655   |
| Increased levels of eNO, n (%)                    | 75 (12.80)            | 25 (9.33)             | 100 (12.00)           | 0.258   |
| Atopy <sup>¶</sup> , n (%)                        | 204 (34.90)           | 96 (35.83)            | 300 (35.50)           | 0.539   |

Data are expressed as medians (25th–75th percentile) unless otherwise stated; Statistically significant differences between sexes are in bold; <sup>†</sup>: in the previous 12 months; <sup>‡</sup>: in the previous 3 months; <sup>§</sup>: defined by at least a 12% and over 200mL increase in forced expiratory volume in 1 second (FEV1); <sup>¶</sup>: defined by a positive skin prick test to at least one of the allergens; FVC: forced vital capacity; FEV1: forced expiratory volume in the first second; FEF25-75: forced expiratory flow middle portion of FVC; FEV1 reversibility: forced expiratory volume in the first second after bronchodilation; FEF25-75 reversibility: forced expiratory flow middle portion of FVC after bronchodilation.

**Table S2.** Association between lung function and MDD-W indicator ( $\beta$  and 95% CI).

| Characteristics        | Crude Model                            | p-value | Model 1                               | p-value | Model 2                               | p-value |
|------------------------|----------------------------------------|---------|---------------------------------------|---------|---------------------------------------|---------|
| FVC                    | −0.02 (−0.09; 0.05)                    | 0.537   | 9.00 × 10 <sup>−3</sup> (−0.07; 0.08) | 0.822   | 9.00 × 10 <sup>−3</sup> (−0.07; 0.09) | 0.823   |
| FVC (% predicted)      | 0.60 (−2.71; 3.90)                     | 0.723   | −1.06 (−4.54; 2.42)                   | 0.550   | −1.18 (−4.66; 2.31)                   | 0.507   |
| FEV1                   | −0.01 (−0.07; 0.05)                    | 0.689   | 0.02 (−0.05; 0.08)                    | 0.638   | 0.02 (−0.05; 0.08)                    | 0.633   |
| FEV1 (% predicted)     | 0.39 (−2.66; 3.44)                     | 0.801   | −1.30 (−4.45; 1.86)                   | 0.420   | −1.41 (−4.57; 1.74)                   | 0.379   |
| FEF25-75               | −7.00 × 10 <sup>−3</sup> (−0.12; 0.11) | 0.899   | 0.05 (−0.08; 0.18)                    | 0.486   | 0.05 (−0.09; 0.18)                    | 0.495   |
| FEF25-75 (% predicted) | 0.04 (−4.79; 4.87)                     | 0.987   | −1.84 (−7.41; 3.74)                   | 0.518   | −1.90 (−7.48; 3.69)                   | 0.505   |
| FEV1 reversibility     | −0.05 (−1.35; 1.25)                    | 0.941   | −0.99 (−2.40; 0.41)                   | 0.166   | −1.01 (−2.42; 0.40)                   | 0.160   |
| FEF25-75 reversibility | 0.74 (−2.56; 4.05)                     | 0.659   | −0.59 (−4.38; 3.21)                   | 0.761   | −0.51 (−4.31; 3.29)                   | 0.792   |

FVC: forced vital capacity; FEV1: forced expiratory volume in the first second; FEF25-75: forced expiratory flow middle portion of FVC; FEV1 reversibility: forced expiratory volume in the first second after bronchodilation; FEF25-75 reversibility: forced expiratory flow middle portion of FVC after bronchodilation; Crude model: main effects; Model 1: age, sex, atopy, self-reported medical diagnosis of FA, body mass index categories, parental education, maternal smoking during pregnancy, tobacco smoke at home, child nutritional supplementation, quartiles of daily eating at home frequency and asthma defined by self-reported medical diagnosis with reported symptoms (wheezing, dyspnea or dry cough) occurring in the past 12 months or positive bronchodilation; Model 2: model 1, concerning food score and total energy intake.
